# Supplementary material for: Exploring biomarkers and therapeutic targets for ischemic stroke through integrated microarray data analysis
Source: Research Square preprint supplement (doi:10.21203/rs.3.rs-1105546/v1), 2021-12-01
Supplement: Supplementary file 1 [file 6c3f2575a1645ba680f01cb4.docx]

Miao Lva,1 · Wanting Hea,1 · Tian Lianga,1 · Jialei Yanga · Xiaolan Huanga · Shengying Liua · Xueying Lianga · Jianxiong Longa,* · Li Sua,*

Miao Lv, Wanting He and Tian Liang contributed equally to this work

Correspondence:

Jianxiong Long

longjx12345@163.com

Li Su

suli2018@hotmail.com

a School of Public Health Guangxi Medical University, Nanning, Guangxi, China

1First co-author

*Corresponding author


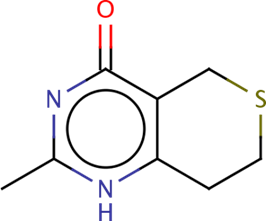


**Fig. S1**  Chemical formula of small molecule compound DR-2313.
